# Supplementary material for: Titanium dioxide nanoparticles affect osteoblast-derived exosome cargos and impair osteogenic differentiation of human mesenchymal stem cells
Source: Royal Society of Chemistry journal article supplement (doi:10.1039/d2bm01854c), 2023-01-01
Supplement: d2bm01854c1.pdf [file d2bm01854c1.pdf]

## **Titanium dioxide nanoparticles affect osteoblasts derived exosomes cargo and impairs osteogenic differentiation of human mesenchymal stem cells**

Wanderson de Souza<sup>a,b</sup>, Sara G. Piperni<sup>b,c</sup>, Liliana Grenho<sup>d,i</sup>, Luís. A. Rocha<sup>e,f</sup>, José M. Granjeiro<sup>a,b,c,g</sup>, Sonia A. Melo<sup>h</sup>, Maria. H. Fernandes<sup>d, i†</sup>, Ana R. Ribeiro<sup>b,j †\*</sup>

<sup>a</sup> Directory of Metrology Applied to Life Sciences, National Institute of Metrology Quality and Technology, Rio de Janeiro, Brazil.

<sup>b</sup> Postgraduate Program in Biotechnology, National Institute of Metrology Quality and Technology, Rio de Janeiro, Brazil.

<sup>c</sup> Postgraduate Program in Translational Biomedicine, University Grande Rio, Duque de Caxias, Brazil.

<sup>d</sup> Faculty of Dental Medicine, University of Porto, Porto, Portugal.

<sup>e</sup> Physics Department, Paulista State University, São Paulo, Brazil.

<sup>f</sup> IBTN/Br – Brazilian Branch of the Institute of Biomaterials, Tribocorrosion and Nanomedicine, São Paulo State University, Bauru, São Paulo, Brazil.

<sup>g</sup> Dental School, Fluminense Federal University, Niterói, Brazil.

<sup>h</sup> i3S-Institute for Research and Innovation in Health, University of Porto, Portugal, Porto, Portugal.

<sup>i</sup> LAQV/REQUIMTE, University of Porto, Porto, Portugal.

<sup>j</sup> NanoSafety group, International Iberian Nanotechnology Laboratory, Braga, Portugal.

<sup>†</sup>Both authors contributed equally to this investigation.

### **Supplementary Information**

**A**

| Titanium dioxide nanoparticles (TiO <sub>2</sub> NPs) |                  |                            |
|-------------------------------------------------------|------------------|----------------------------|
| Sample                                                | Average size     | Polydispersity index (PDI) |
| TiO <sub>2</sub> 0 Hours                              | 247,50 ± 13,3 nm | 0,77 ± 0,06                |
| TiO <sub>2</sub> 24 Hours                             | 113,03 ± 1,1 nm  | 0,18 ± 0,01                |
| TiO <sub>2</sub> αMEM 10% FBS                         | 143,43 ± 2,2 nm  | 0,24 ± 0,01                |

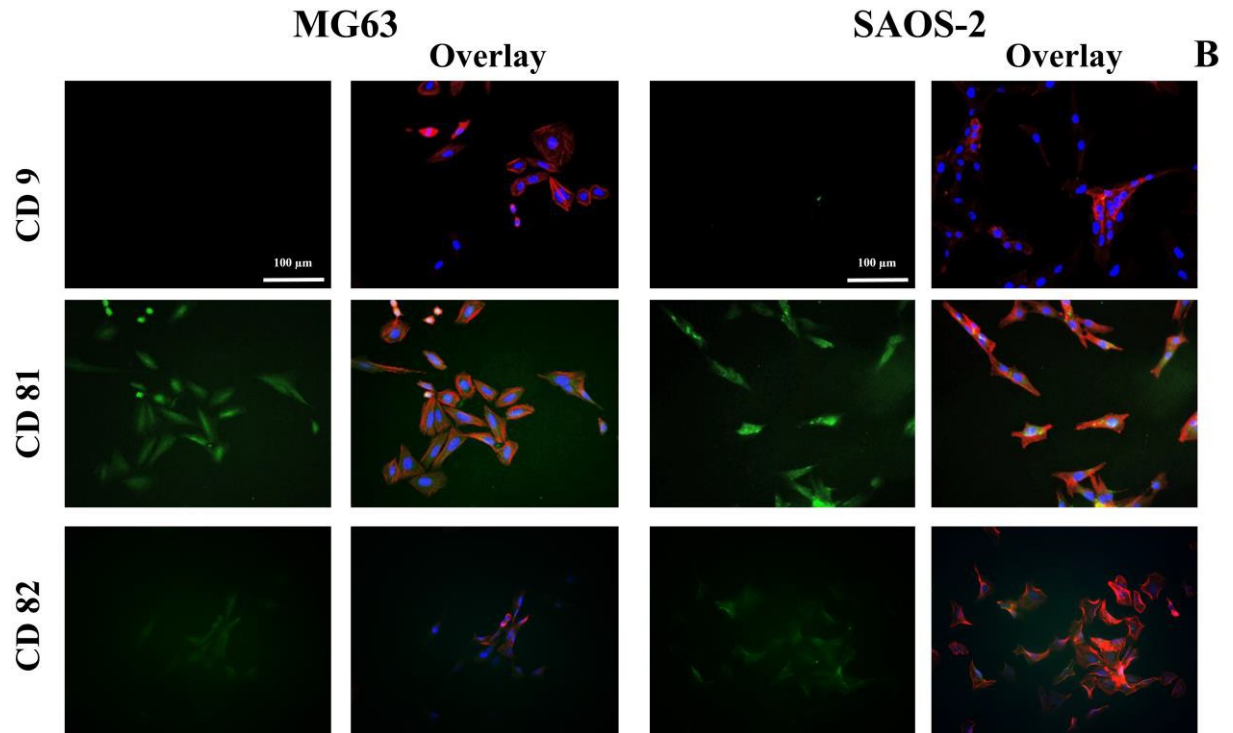

**Figure of Complementary Information. 1: TiO<sub>2</sub> NPs and definition of Exos markers suitable for osteoblast cell lines:** Table with the average size and polydispersity index of TiO<sub>2</sub> NPs in water and culture medium that was evaluated by dynamic light scattering (A). Fluorescence micrographs of MG63 and SAOS-2 cells were marked in green for CD9, CD81, and CD82 (B), F-actin in red, and nucleus in blue (scale bar: 100 μm). The experiment was performed with a n = 3.

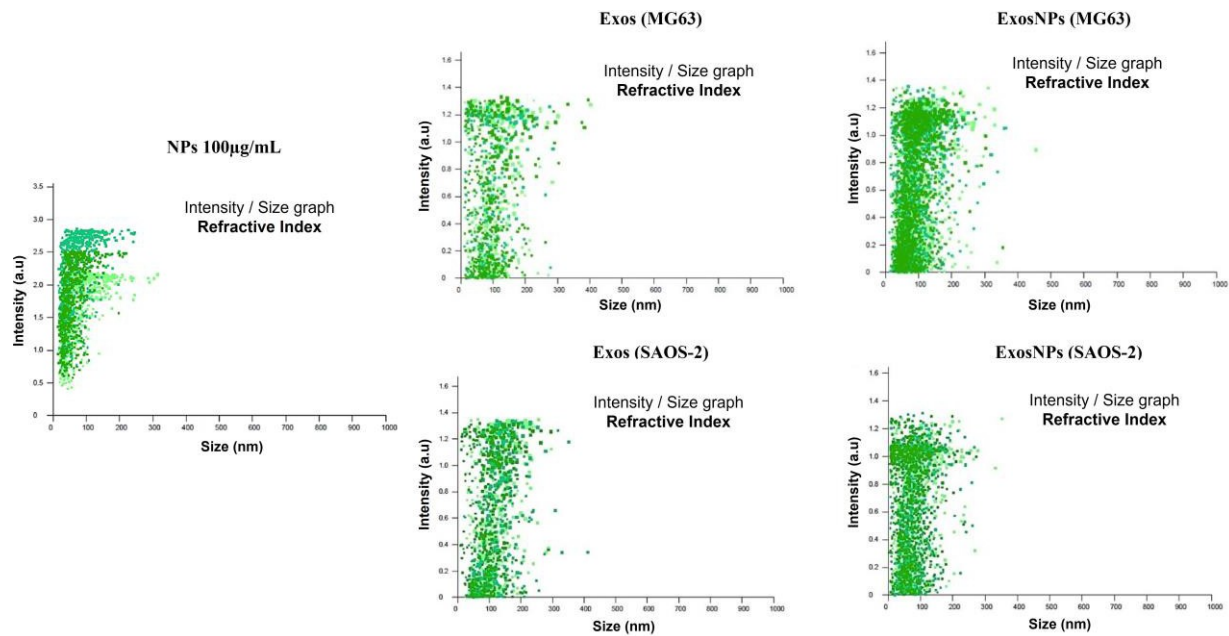

**Complementary Information Figure. 2: Nanoparticle Tracking Analysis (NTA) for identifying TiO<sub>2</sub> NPs in Exos:** NTA showing the refractive index of TiO<sub>2</sub> NPs diluted in water (100 µg/mL); Exos obtained from Immature osteoblasts (ExosMG63) and osteoblasts (ExosSAOS2) without interaction with TiO<sub>2</sub> NPs (control); Exos obtained from immature osteoblasts (ExosNPs (MG63)) and osteoblasts (ExosNPs (SAOS-2)) after interaction with TiO<sub>2</sub> NPs for 72 hours. The experiment was performed with a n = 3.

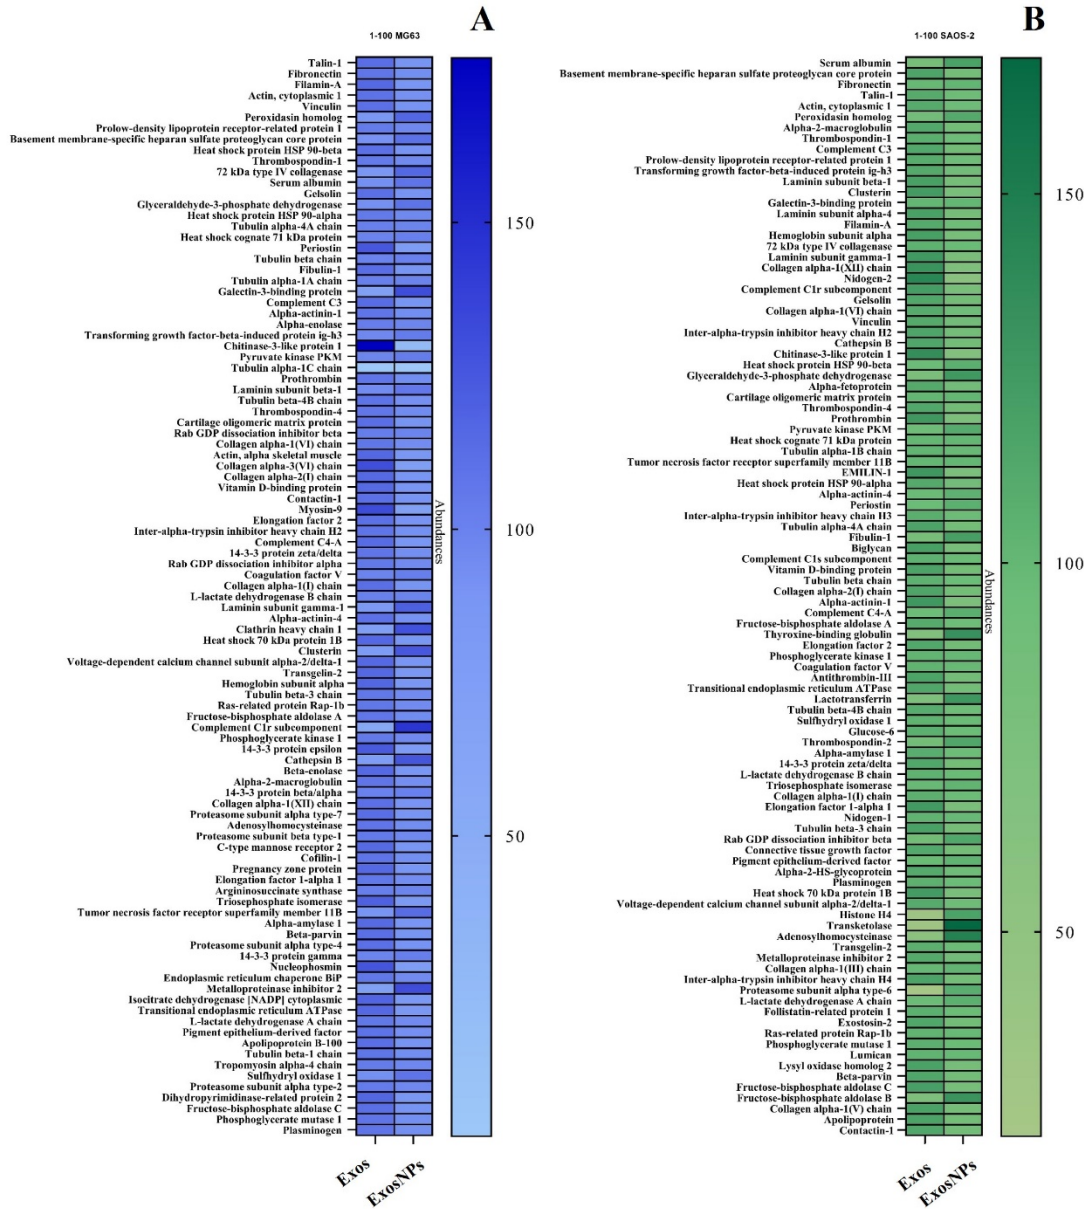

**Complementary Information Figure. 3** TiO<sub>2</sub> nanoparticles alter the charge of exosomes derived from MG63 and SAOS-2: (A) Heat map of identified proteins from three replicated samples of Exos derived from MG63 and SAOS-2 exposed or not to TiO<sub>2</sub> NPs by LC-MS/MS (Abundance = amount of peptides). The samples were analyzed in the Uniprot database for taxonomic selection for Homo sapiens. Data are presented as mean  $\pm$  sd. Statistical significance was calculated by one-way ANOVA and the unpaired Student's *t*-test (\**P* < 0.01, significant difference between control (Exos) and treatment (Exos/NPs), *n* = 3)).
